# Supplementary material
Source: PubMed Central journal article supplement (PMC9547837)

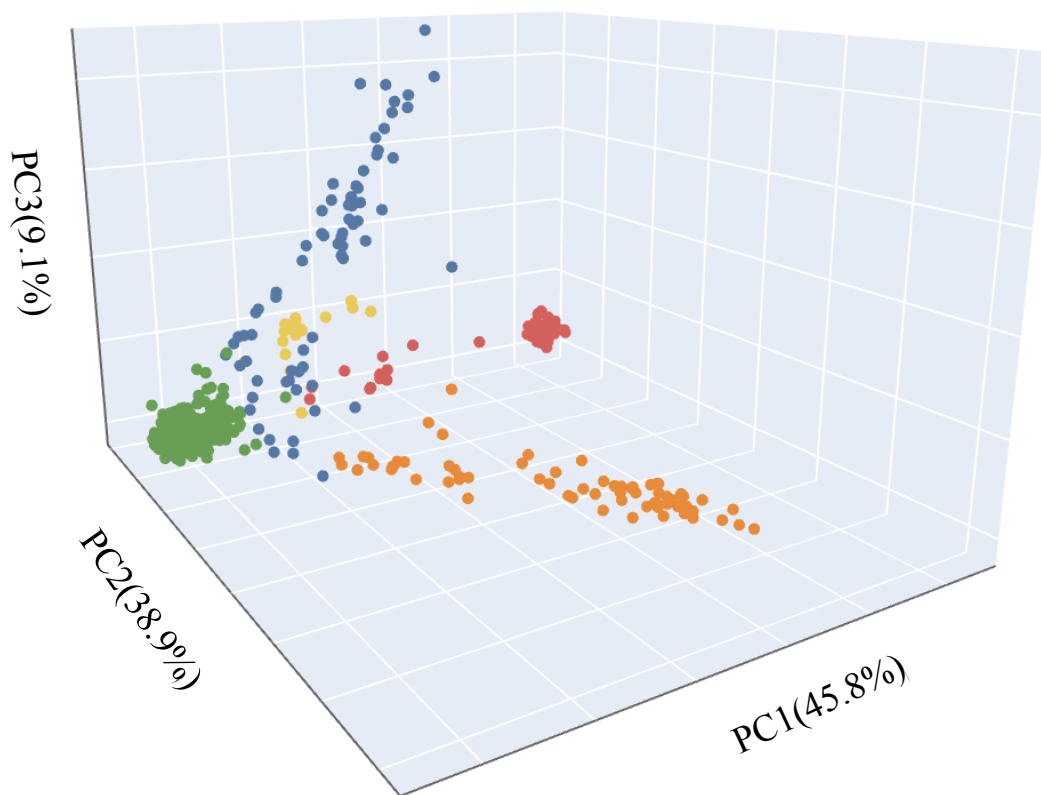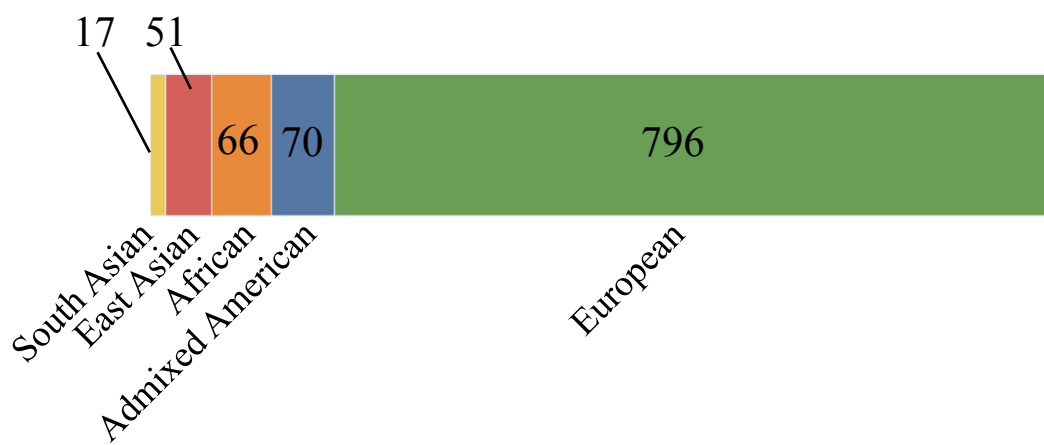

Figure E1

Supplement: NIHMS1823027-supplement-Figure_E1.pdf [file NIHMS1823027-supplement-Figure_E1.pdf]

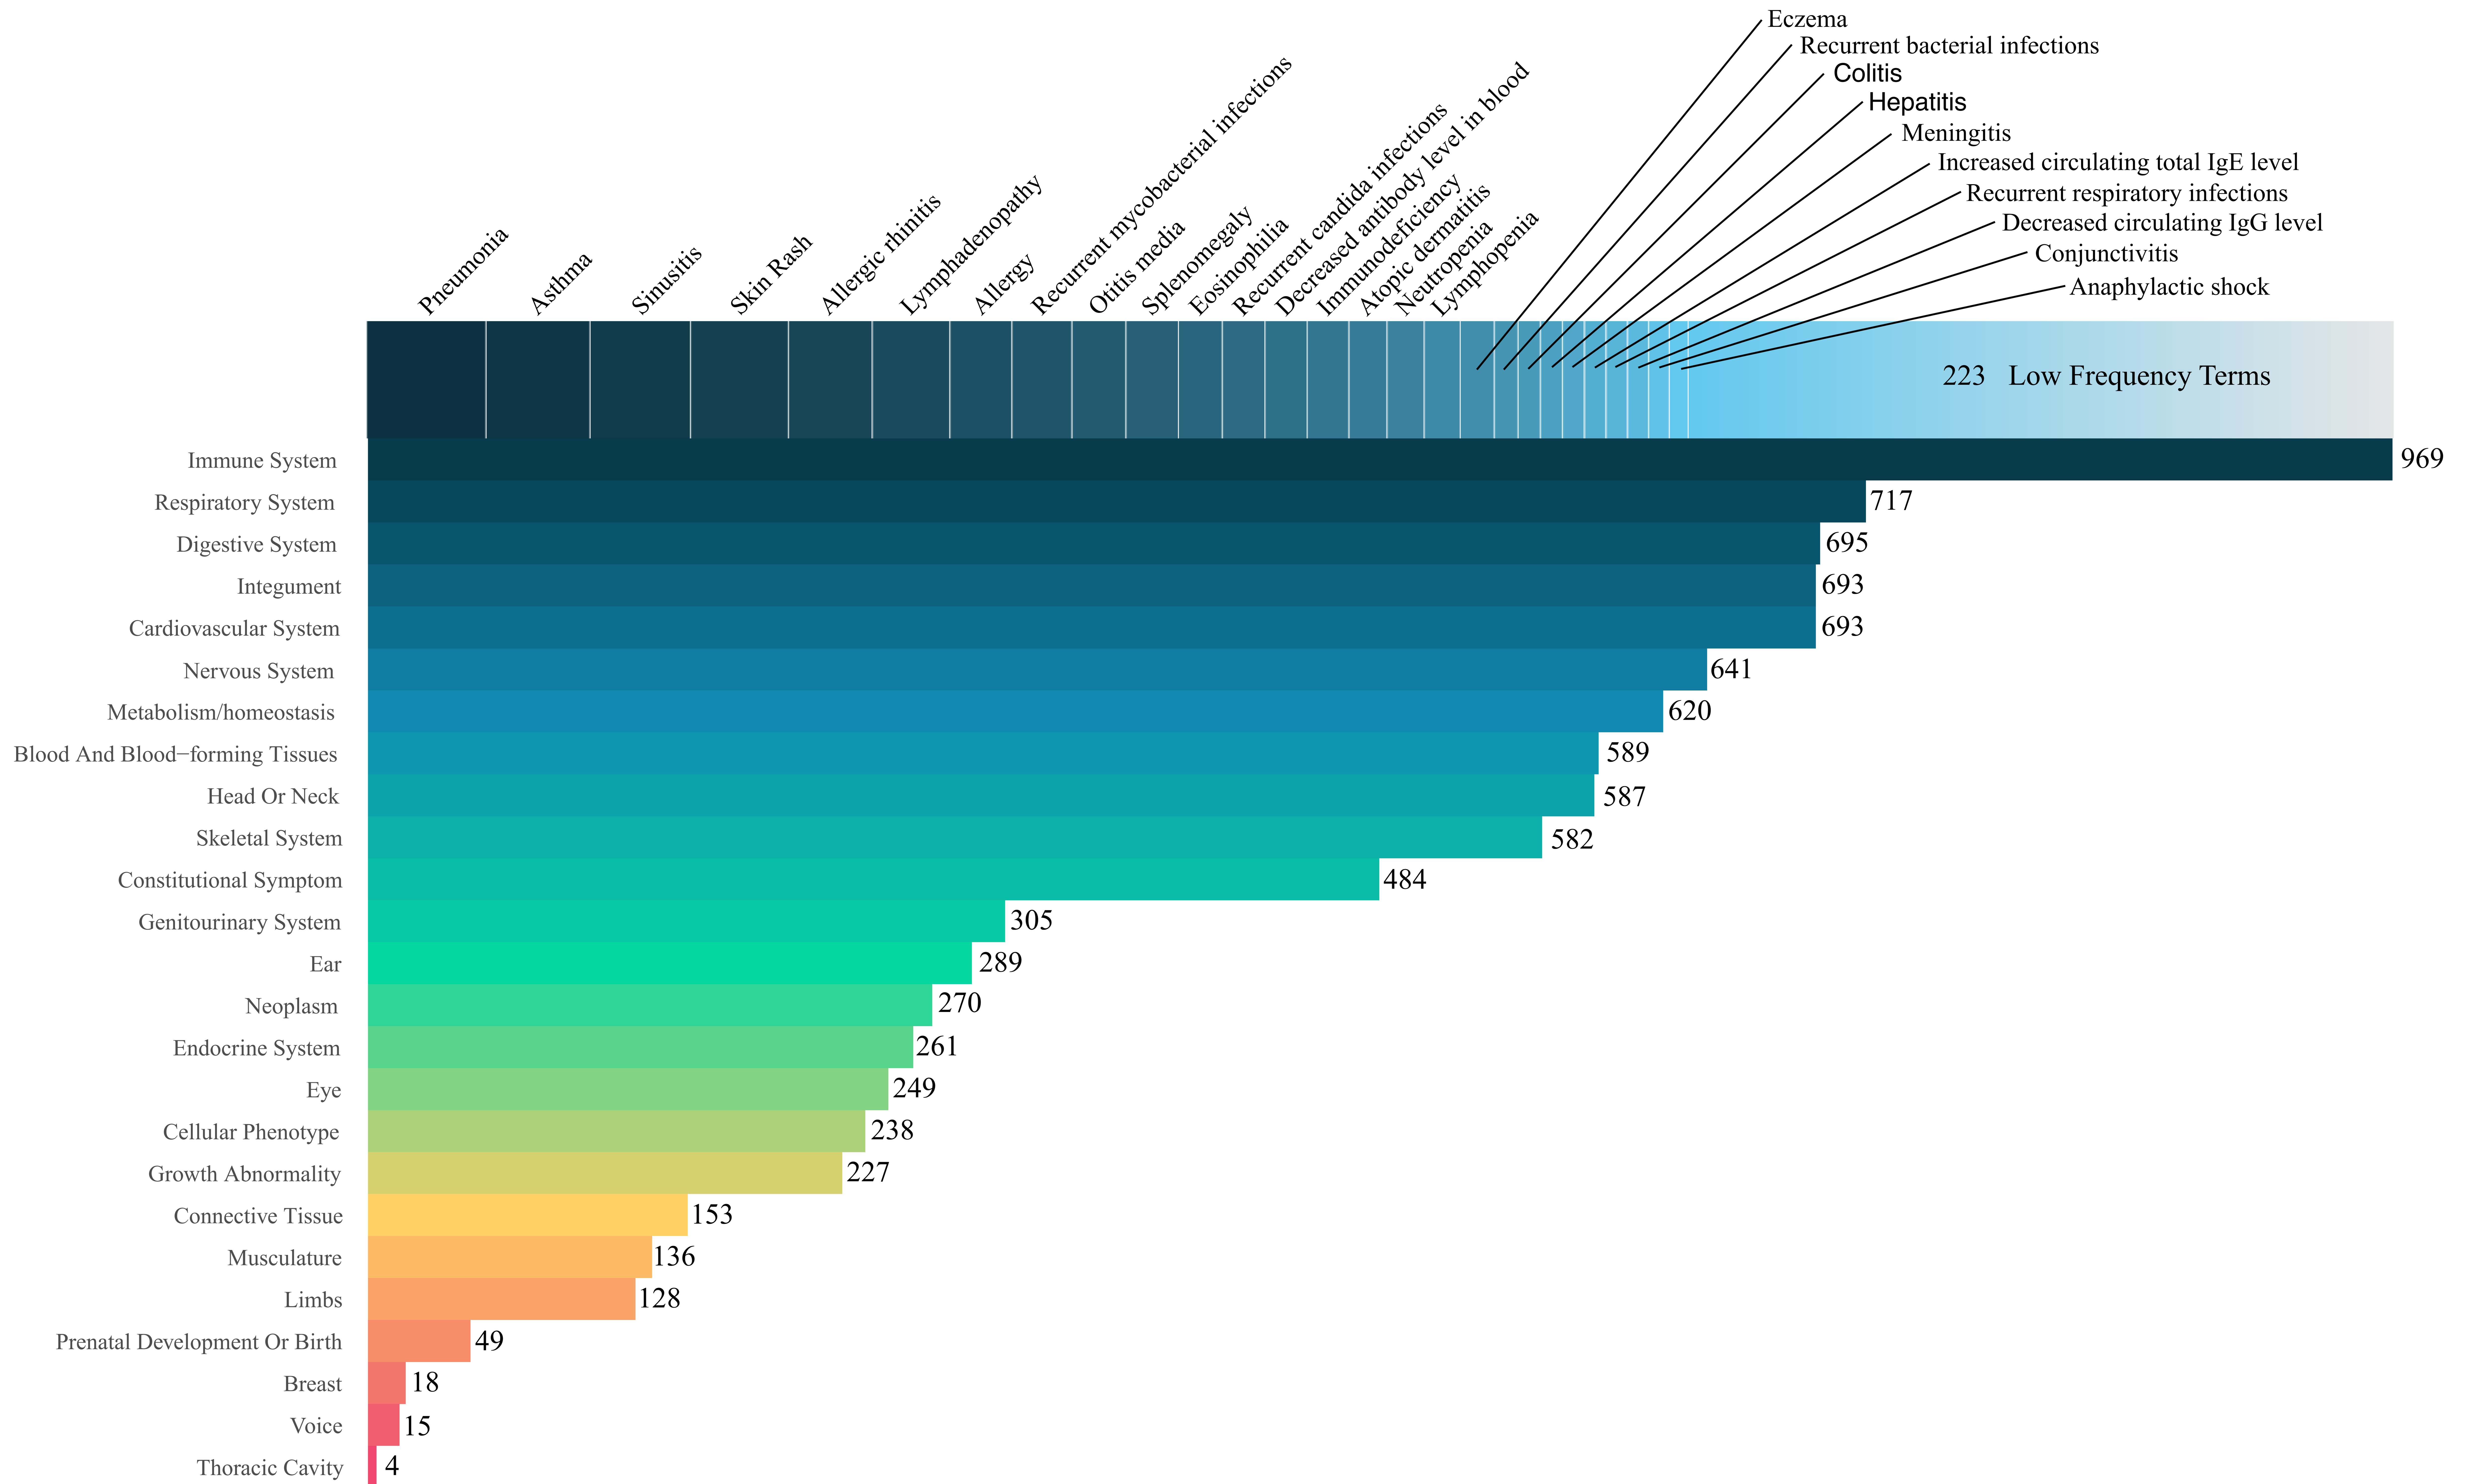

Figure E2

Supplement: NIHMS1823027-supplement-Figure_E2.pdf [file NIHMS1823027-supplement-Figure_E2.pdf]
